# Supplementary material for: Clinical and Genetic Features of Korean Patients with Achromatopsia
Source: MDPI journal article supplement (doi:10.3390/genes14020519), 2023-02-18
Supplement: s1 [file s1]

**Table S1.** Number of patients in CNGA3 and PDE6C achromatopsia, grouped by structural changes obtained from OCT.

| Features               |        | OCT findings   |                |                      | Alternative hypothesis                               |
|------------------------|--------|----------------|----------------|----------------------|------------------------------------------------------|
|                        |        | ISe change (-) | ISe change (+) | p-value              |                                                      |
| Genes with variants, n | CNGA3  | 5              | 3              | 0.023 <sup>*,a</sup> | CNGA3-ACHM group has higher proportion of normal ISe |
|                        | Others | 2              | 10             |                      |                                                      |
|                        | PDE6C  | 0              | 8              | 0.003 <sup>*,b</sup> | PDE6C-ACHM group has lower proportion of normal ISe  |
|                        | Others | 7              | 5              |                      |                                                      |

<sup>a</sup> Boschloo's one-tailed exact test comparing the proportion of patients with normal ISe. The alternative hypothesis of each test is described in the right-most column. OCT findings were derived from the date of the most recent OCT images. Abbreviations: OCT, optical coherence tomography; ISe, inner segment of ellipsoid zone.

**Table S2.** Results of pairwise comparison of one-sided, exact tests comparing features associated with structural changes.

| Alternative Hypothesis                                                                                                                                             |       |         |       |
|--------------------------------------------------------------------------------------------------------------------------------------------------------------------|-------|---------|-------|
| The group of patients with the causative gene in the row has a higher proportion of normal ISe on the OCT than the groups of patients with the gene in the column. |       |         |       |
|                                                                                                                                                                    | CNGB3 | PDE6C   | GNAT2 |
| CNGA3                                                                                                                                                              | 0.094 | 0.005 * | 1.0   |
| CNGB3                                                                                                                                                              |       | N/A     | 1.0   |
| PDE6C                                                                                                                                                              |       |         | 1.0   |

<sup>a</sup> Boschloo's one-tailed exact test comparing the proportion of patients with normal ISe. OCT findings were derived from the date of the most recent OCT images. Abbreviations: OCT, optical coherence tomography; ISe, inner segment of ellipsoid zone.

**Table S3.** Number of patients with structural changes obtained from OCT.

| Genes with variants | OCT Findings   |                | p-value              |
|---------------------|----------------|----------------|----------------------|
|                     | ISe change (-) | ISe change (+) |                      |
| CNGA3               | 5              | 3              | 0.047 <sup>*,a</sup> |
| Others              | 2              | 10             |                      |
| CNGB3               | 0              | 2              | 0.557 <sup>a</sup>   |
| Others              | 7              | 11             |                      |
| PDE6C               | 0              | 8              | 0.007 <sup>*,a</sup> |
| Others              | 7              | 5              |                      |
| GNAT2               | 2              | 0              | 0.121 <sup>a</sup>   |
| Others              | 5              | 13             |                      |

<sup>a</sup> Boschloo's two-sided exact test, OCT findings, and age were derived from the date of the most recent OCT images. Abbreviations: OCT, optical coherence tomography; ISe, inner segment of ellipsoid zone.
